# Supplementary material for: Emergence and Evolution of OXA-23-Producing ST46Pas-ST462Oxf-KL28-OCL1 Carbapenem-Resistant Acinetobacter baumannii Mediated by a Novel ISAba1-Based Tn7534 Transposon
Source: MDPI journal article supplement (doi:10.3390/antibiotics12020396), 2023-02-16
Supplement: s1 [file s1]

Figure S1. Pan-genome analysis of ST46Pas *A. baumannii* strains using Roary.

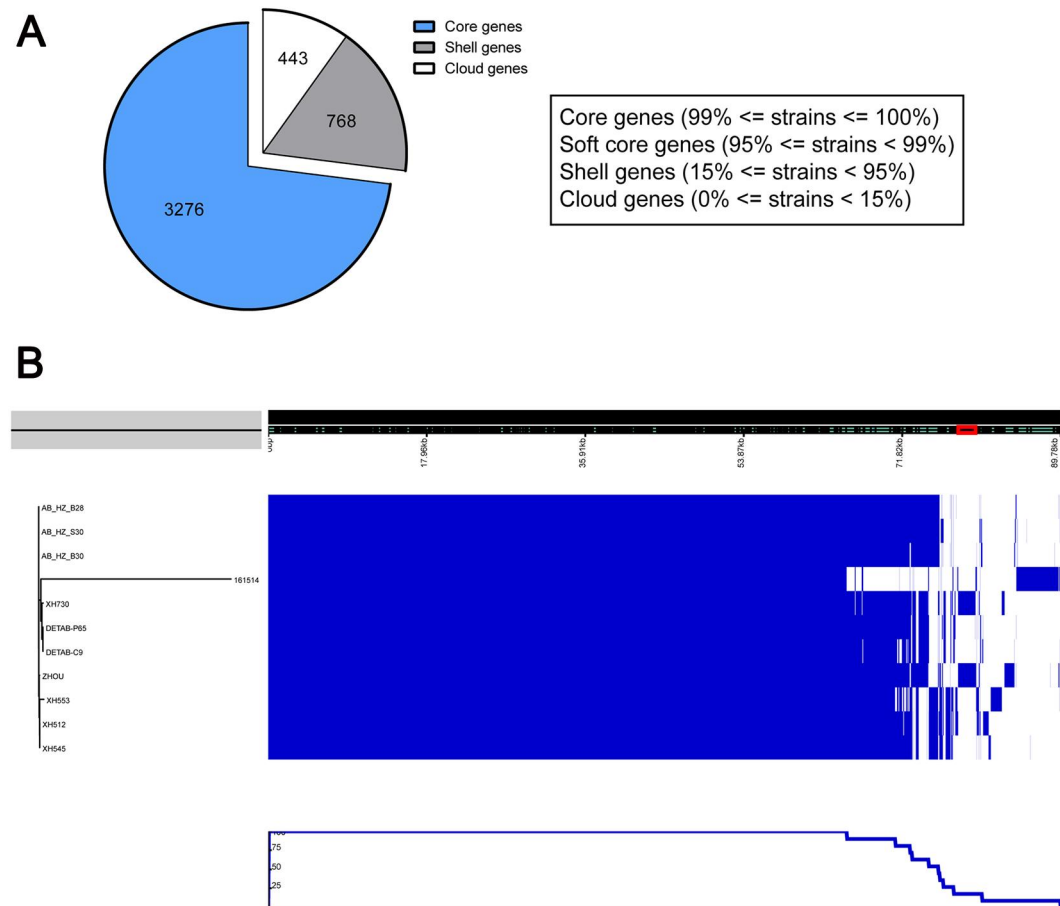

Table S1. Site-specific recombinases XerC/XerD (C/D) and XerD/XerC (D/C) in the chromosome of *A. baumannii* ZHOU isolate

| Name            | Start   | End     | Left arm        | Center | Right arm   | Site             |
|-----------------|---------|---------|-----------------|--------|-------------|------------------|
| <i>pdif</i> -1  | 89357   | 89384   | ATTTCGCTAA      | TCGGTT | TTATTTTATTG | C D              |
| <i>pdif</i> -2  | 113932  | 113959  | ATTTAAAATAA     | AAATAC | TTATATTACTT | D C <sup>1</sup> |
| <i>pdif</i> -3  | 449000  | 449027  | TTTTACATAA      | TAAGTT | TTTGTAAATT  | C D              |
| <i>pdif</i> -4  | 645347  | 645374  | ATATTTTATAA     | TTTATT | GTATTTTAAAT | D C              |
| <i>pdif</i> -5  | 1402913 | 1402940 | TGTTTCGTATAA    | TGTATA | TTATGTTAAAT | C D              |
| <i>pdif</i> -6  | 1435523 | 1435550 | ATTAAATATAA     | GTTTAA | TTATGTAATAT | D C              |
| <i>pdif</i> -7  | 1741796 | 1741823 | AGTTAAAATA<br>A | TATATA | TCATATTAAAA | C D              |
| <i>pdif</i> -8  | 1909999 | 1910026 | CTTTAAAATAA     | GTATTA | TTATGAAGATT | D C              |
| <i>pdif</i> -9  | 2821899 | 2821926 | GTAAACCTAA      | GAAACC | TTATTTTAAAT | C D              |
| <i>pdif</i> -10 | 2838943 | 2838970 | TCTCAACATAA     | AAATAT | TGAAGTTAAAT | D C              |
| <i>pdif</i> -11 | 2956941 | 2956968 | AATAAACATA<br>A | ACTGAG | ATATTTTAAAT | C D              |
| <i>pdif</i> -12 | 3037792 | 3037819 | ATTTATTATAA     | ATATAA | TTATTTTATTC | D C              |

|                 |         |         |                 |        |             |     |
|-----------------|---------|---------|-----------------|--------|-------------|-----|
| <i>pdif</i> -13 | 3902192 | 3902219 | ATGTAAGGTA<br>A | ACGGTC | TTCTTCGATAT | C D |
| <i>pdif</i> -14 | 3937447 | 3937474 | AGATGGTATA<br>A | ATACTC | TTAAGTTATAT | D C |

---

<sup>1</sup>*pdif*-2 and *pdif*-3 sites with grey shading were located in each side of *bla*<sub>OXA-23</sub> segment, respectively.
